# Supplementary material for: Why is end-of-life inpatient cost high among cancer patients? A prospective cohort study
Source: Research Square preprint supplement (doi:10.21203/rs.3.rs-3218982/v1), 2023-08-09
Supplement: Supplementary file 1 [file c28ab6237717e19a6f800692.docx]

**Appendix 1**

We decomposed the total inpatient cost (for all admissions, low- and high-intensity admissions) into cost incurred for the following inpatient services:

(a) *ward*: includes cost of stay in ward and daily treatment fee;

(b) *investigations*: includes cost of laboratory investigations, x-ray, scan, MRI and special investigations;

(c) *surgery*: includes surgeon fee, anesthetist fee, facility fee and cost of implants;

(d) *maintenance*: includes fee for doctor consultations, counselling, speech therapy, feeding, pain management, physiotherapy, occupational therapy, nutrition therapy etc.;

(e) *ICU and related units:* includes cost of stay in ICU/high dependency unit/cardiac care unit and daily treatment fee in these units;

(f) *procedures:*includes cost of procedures such as inpatient chemotherapy, radiotherapy, dialysis and some invasive procedures; does not include cost of procedures which are provided in outpatient setting

(g) *consumables*: includes cost of items used to treat patients such as bandages, IV solution, oxygen usage and other supplies from retail pharmacy; also includes cost of items and medical devices used in operation theatre

(h) *drugs*: includes cost of inpatient prescription drugs; does not include cost of outpatient prescription drugs

(i) *others*: includes cost of routine ward procedures such as dressing, non-treatment and miscellaneous cost.

**Supplementary Tables:**

**Supplementary Table 1: Average total inpatient cost incurred for different inpatient services during the last two years of life**

|  | Ward | Investigations | Surgery | Maintenance | Intensive Care and related units | Procedures | Consumables | Drugs | Other | Average total inpatient cost |
| --- | --- | --- | --- | --- | --- | --- | --- | --- | --- | --- |
| **All Admissions** |  |  |  |  |  |  |  |  |  |  |
| 1 month before death | 1915.3 | 1396.1 | 354.1 | 695.1 | 218.9 | 129.0 | 471.6 | 419.4 | 395.8 | 5995.2 |
| 0-2 months before death | 3286.1 | 2317.5 | 553.2 | 1050.0 | 331.0 | 175.1 | 707.9 | 758.2 | 593.2 | 9771.9 |
| 0-6 months before death | 6033.5 | 4734.7 | 1323.2 | 1713.1 | 883.8 | 360.8 | 1305.9 | 1576.3 | 1210.5 | 19141.4 |
| 6-12 months before death | 2154.1 | 1971.3 | 992.6 | 398.0 | 196.1 | 142.4 | 663.8 | 643.9 | 556.1 | 7718.4 |
| **Low-Intensity Admissions** |  |  |  |  |  |  |  |  |  |  |
| 1 month before death | 1355.0 | 550.3 | 38.8 | 375.0 | 0.0 | 64.4 | 205.0 | 167.6 | 180.2 | 2936.2 |
| 0-2 months before death | 2440.9 | 1087.7 | 109.9 | 595.0 | 11.2 | 100.8 | 345.4 | 304.7 | 320.4 | 5315.8 |
| 0-6 months before death | 4176.4 | 2192.4 | 263.0 | 926.2 | 187.1 | 191.5 | 543.2 | 596.6 | 605.6 | 9681.8 |
| 6-12 months before death | 1418.0 | 867.6 | 154.6 | 200.9 | 42.3 | 64.3 | 162.9 | 288.7 | 189.2 | 3388.4 |
| **High-Intensity Admissions** |  |  |  |  |  |  |  |  |  |  |
| 1 month before death | 560.3 | 845.8 | 315.4 | 320.1 | 218.9 | 64.5 | 266.6 | 251.8 | 215.5 | 3059.0 |
| 0-2 months before death | 845.2 | 1229.8 | 443.3 | 455.0 | 319.8 | 74.4 | 362.5 | 453.4 | 272.8 | 4456.2 |
| 0-6 months before death | 1857.1 | 2542.3 | 1060.2 | 786.9 | 696.7 | 169.2 | 762.7 | 979.7 | 604.9 | 9459.6 |
| 6-12 months before death | 736.0 | 1103.7 | 838.1 | 197.1 | 153.8 | 78.1 | 501.0 | 355.2 | 367.0 | 4330.0 |

**Supplementary Table 2: Mean total inpatient cost, total number of days in hospital, total number of admissions and mean inpatient cost per day during the last two years of life**

| Months before death | Mean total inpatient cost (SGD) | | | Total days in hospital | | |
| --- | --- | --- | --- | --- | --- | --- |
|  | All | Low Intensity | High Intensity | All | Low Intensity | High Intensity |
| 0-1 | 5995 | 2936 | 3059 | 2252 | 1524 | 728 |
| 1-2 | 3777 | 2380 | 1397 | 1604 | 1240 | 364 |
| 2-3 | 4043 | 1477 | 2566 | 1316 | 700 | 616 |
| 3-4 | 2339 | 1255 | 1084 | 913 | 596 | 317 |
| 4-5 | 1693 | 1067 | 627 | 650 | 494 | 156 |
| 5-6 | 1294 | 567 | 727 | 478 | 305 | 173 |
| 6-7 | 1392 | 791 | 601 | 502 | 370 | 132 |
| 7-8 | 1618 | 848 | 769 | 556 | 420 | 136 |
| 8-9 | 1246 | 619 | 628 | 427 | 291 | 136 |
| 9-10 | 1173 | 264 | 910 | 317 | 123 | 194 |
| 10-11 | 1214 | 524 | 690 | 382 | 227 | 155 |
| 11-12 | 1075 | 343 | 732 | 331 | 173 | 158 |
| Months before death | Total number of admissions | | | Mean inpatient cost per day (SGD) | | |
|  | All | Low Intensity | High Intensity | All | Low Intensity | High Intensity |
| 0-1 | 265 | 169 | 96 | 1169 | 846 | 1845 |
| 1-2 | 180 | 122 | 58 | 1034 | 842 | 1685 |
| 2-3 | 144 | 83 | 61 | 1349 | 926 | 1829 |
| 3-4 | 113 | 72 | 41 | 1125 | 924 | 1502 |
| 4-5 | 90 | 56 | 34 | 1144 | 948 | 1763 |
| 5-6 | 72 | 38 | 34 | 1189 | 817 | 1844 |
| 6-7 | 76 | 42 | 34 | 1217 | 938 | 2000 |
| 7-8 | 73 | 37 | 36 | 1277 | 887 | 2484 |
| 8-9 | 65 | 34 | 31 | 1282 | 934 | 2026 |
| 9-10 | 64 | 26 | 38 | 1625 | 942 | 2059 |
| 10-11 | 67 | 36 | 31 | 1395 | 1014 | 1953 |
| 11-12 | 57 | 26 | 31 | 1426 | 869 | 2035 |

**Supplementary Table 3: Predictors of likelihood and average monthly cost (between surveys) of all, high and low-intensity admissions**

|  | All Admissions | Low Intensity Admissions | High Intensity Admissions |
| --- | --- | --- | --- |
| Part 1-Logit |  |  |  |
| Symptom burden score | 0.04*** | 0.04*** | 0.02*** |
|  | [0.03,0.05] | [0.03,0.05] | [0.01,0.04] |
| Age | -0.01** | -0.01 | -0.01** |
|  | [-0.02,-0.00] | [-0.01,0.00] | [-0.02,-0.00] |
| Preference for more life extension | 0.00 | -0.03 | 0.04* |
|  | [-0.04,0.04] | [-0.07,0.02] | [-0.01,0.09] |
| Inaccurate prognostic awareness | 0.21* | 0.12 | 0.19 |
|  | [-0.00,0.42] | [-0.13,0.37] | [-0.07,0.45] |
| Have private health insurance | 0.04 | -0.06 | 0.19 |
|  | [-0.15,0.23] | [-0.28,0.16] | [-0.05,0.44] |
| Part 2-GLM |  |  |  |
| Symptom burden score | 0.00 | 0.01 | 0.00 |
|  | [-0.01,0.01] | [-0.00,0.02] | [-0.47,0.14] |
| Age | 0.00 | 0.00 | 0.00 |
|  | [-0.01,0.00] | [-0.01,0.01] | [-0.02,0.02] |
| Preference for more life extension | 0.03* | -0.03 | 0.07** |
|  | [-0.01,0.07] | [-0.07,0.01] | [-0.02,0.01] |
| Inaccurate prognostic awareness | 0.22** | 0.04 | 0.34** |
|  | [0.00,0.44] | [-0.19,0.27] | [0.01,0.14] |
| Have private health insurance | 0.00 | 0.15 | -0.16 |
|  | [-0.19,0.20] | [-0.05,0.35] | [0.01,0.66] |
